# Supplementary material for: Long non-coding RNAs as prognostic markers in human breast cancer
Source: PubMed Central journal article supplement (PMC4991477; doi:10.18632/oncotarget.7828), 2016-03-01
Supplement: oncotarget-07-20584-s001.pdf [file oncotarget-07-20584-s001.pdf]

SUPPLEMENTARY FIGURES AND TABLES

A

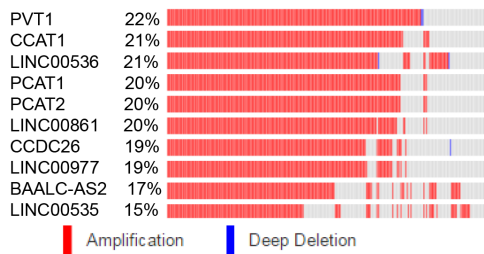

B

| lncRNA     | Location       | Region on chromosome             | cDNA (bp) | Accession | Exon |
|------------|----------------|----------------------------------|-----------|-----------|------|
| LINC00535  | 8q22.1         | 94,358,695---94,712,661          | 1,924     | NR_033858 | 11   |
| BAALC-AS2  | 8q22.3         | 104,145,191---104,153,570        | 496       | NR_027071 | 2    |
| LINC00536  | 8q22.3         | 116,962,736---117,337,297        | 2,692     | NR_046215 | 14   |
| LINC00861  | 8q24.3         | 126,953,376---126,963,441        | 5,338     | NR_038446 | 2    |
| PCAT1      | 8q24.21        | 128,025,399---128,033,259        | 1,992     | NR_045262 | 2    |
| PCAT2      | 8q24.21        | 128,084,939---128,094,466        | 575       | NR_119373 | 4    |
| CCAT1      | 8q24.21        | 128,219,629---128,231,333        | 2,795     | NR_108049 | 2    |
| PVT1       | 8q24.21        | 128,806,803---128,952,702        | 1,716     | NR_003367 | 8    |
| LINC00977  | 8q24.21        | 130,228,713---130,253,486        | 1,164     | NR_033916 | 3    |
| CCDC26     | 8q24.21        | 130,363,940---130,365,228        | 1,666     | NR_130920 | 4    |
| <b>MYC</b> | <b>8q24.21</b> | <b>128,747,765---128,751,018</b> |           |           |      |

C

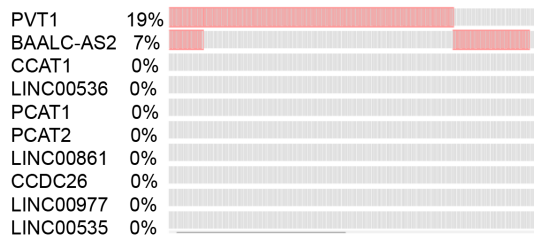

D

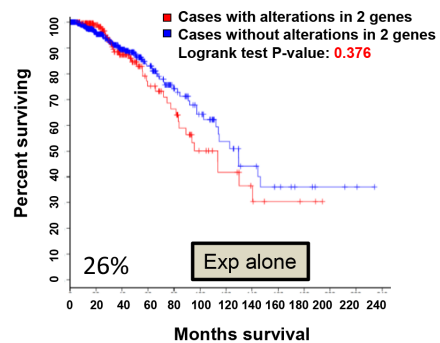

**Supplementary Figure S1: Alterations in copy number and RNA expression for lncRNAs associated with poor OS.** **A.** Relative alteration frequency of copy number for 10 lncRNAs. **B.** Listed 10 lncRNAs with location, cDNA size and accession numbers. **C.** Only 2 lncRNAs (PVT1 and BAALC-AS2) revealed alterations of RNA expression. **D.** Association between expression of PVT1 and BAALC-AS2 and OS is not significant.

**A**

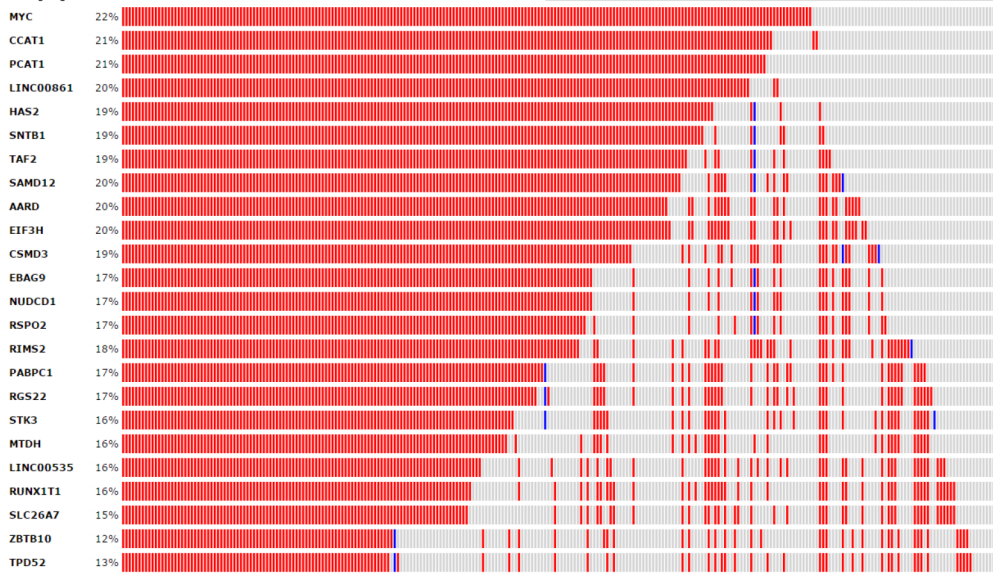

**B**

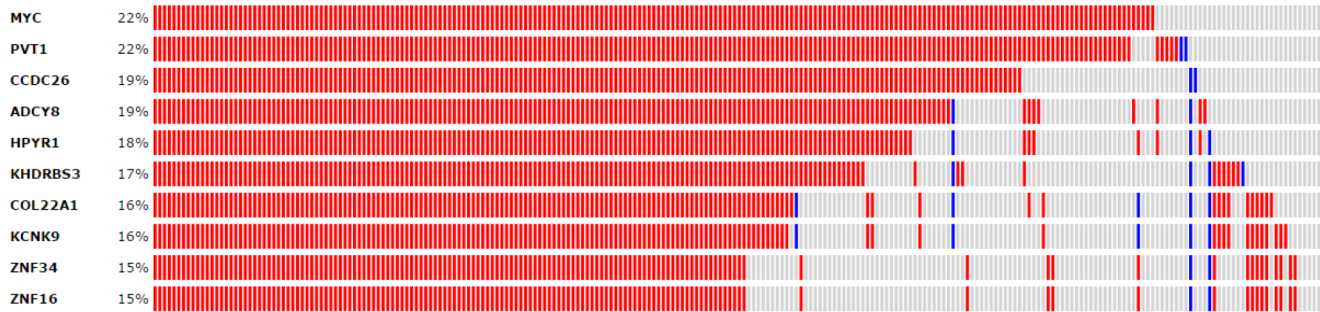

**Supplementary Figure S2: Alterations in copy-number of lincRNAs related to Myc. A.** Relative alteration frequency of copy number toward right side of Myc. **B.** Relative alteration frequency of copy number toward left side of Myc.

A

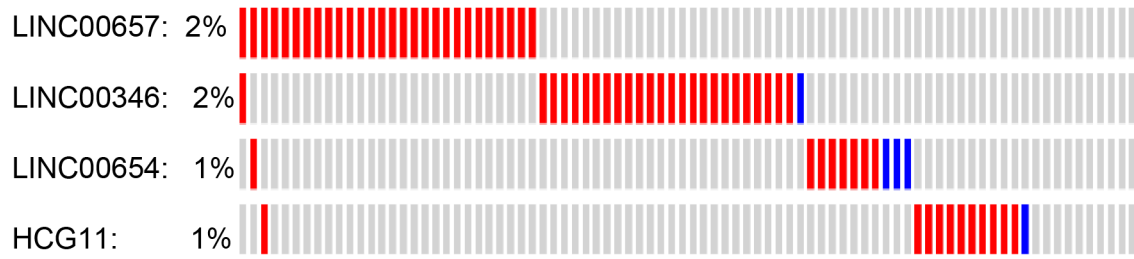

B

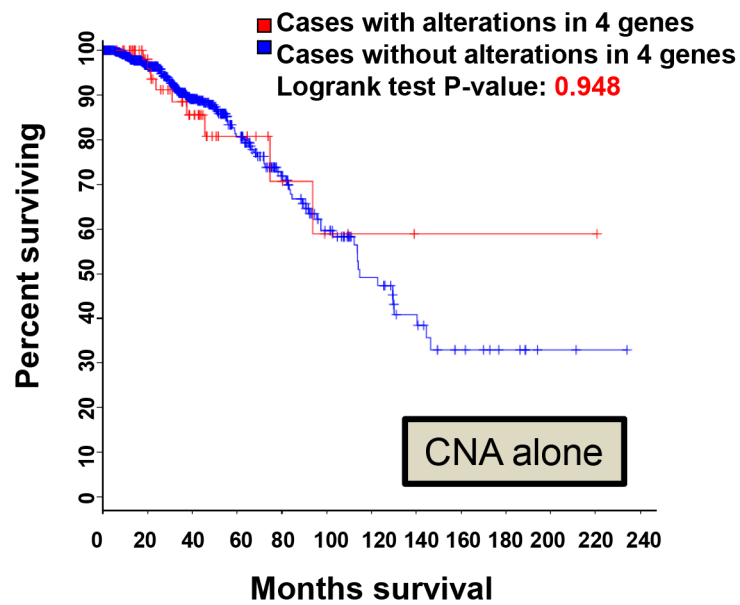

**Supplementary Figure S3: Alterations in copy number of lncRNA signature 2.** A. Relative frequency of CNA for 4 lncRNAs. B. Association between CNA and OS is not significant.

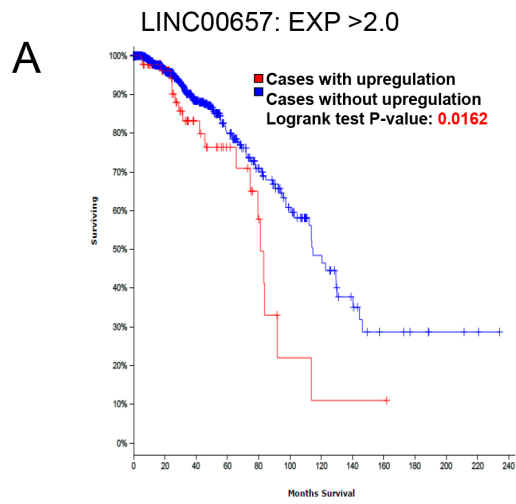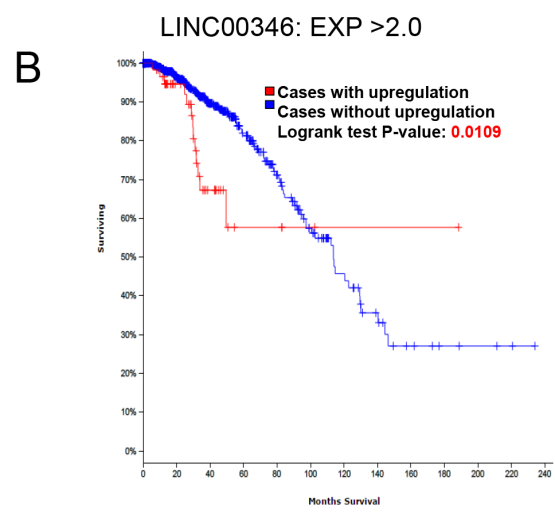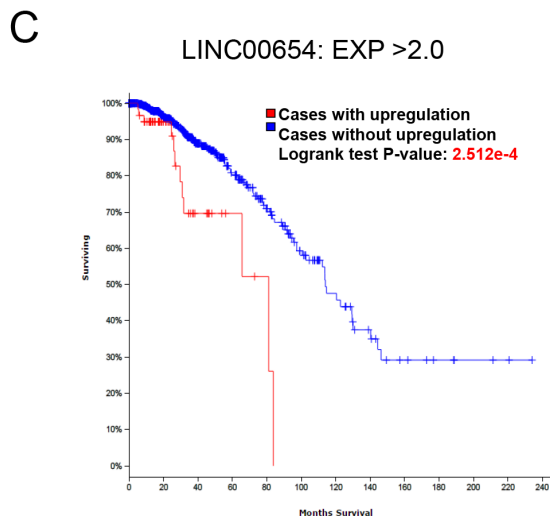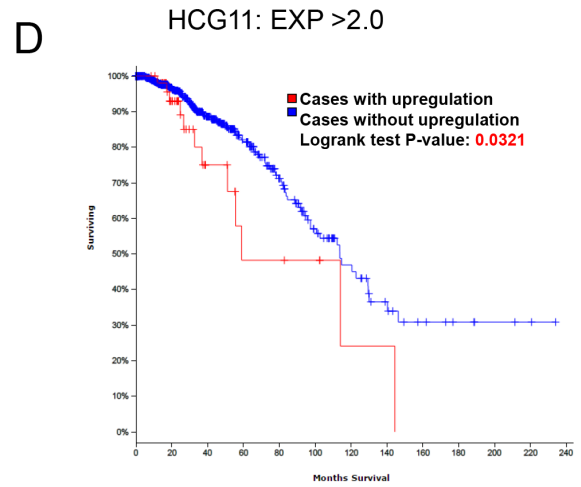

Supplementary Figure S4: Association of 4 individual lncRNAs with OS.

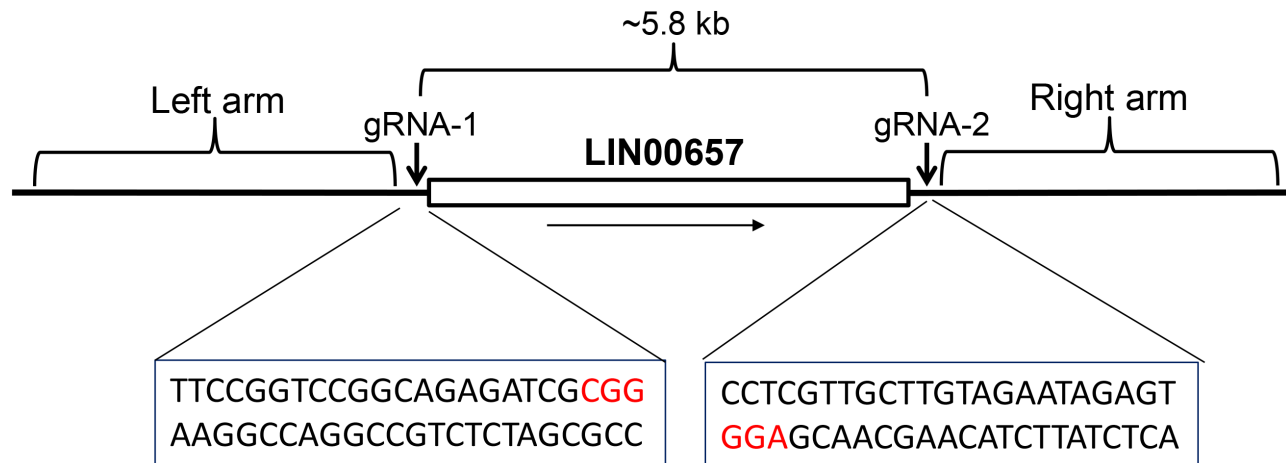

**Supplementary Figure S5: A strategy for generation of LIN00657 knockout by CRISPR/Cas9.** Two gRNA sequences are shown in bottom; PAM motifs are shown in red.

### Primary search with default setting

The screenshot shows the cBioPortal search interface with default settings. The 'Select Cancer Study' dropdown is set to 'breast', showing a tree view of cancer types. The 'Select Genomic Profiles' section has 'Mutations' selected, which is circled in green. A purple arrow points to the 'Breast Invasive Carcinoma (TCGA, Provisional) 2105 samples' option in the 'Select Cancer Study' section. The 'Select Patient/Case Set' is set to 'All Complete Tumors (960)'. The 'Enter Gene Set' section is empty. A 'Submit' button is at the bottom.

### Search with expression (RNA-seq)

The screenshot shows the cBioPortal search interface with RNA-seq expression settings. The 'Select Cancer Study' dropdown is set to 'breast', showing a tree view of cancer types. The 'Select Genomic Profiles' section has 'mRNA Expression data' selected, which is circled in green. A purple arrow points to the 'Breast Invasive Carcinoma (TCGA, Provisional) 2105 samples' option in the 'Select Cancer Study' section. The 'Select Patient/Case Set' is set to 'Tumor Samples with mRNA data (RNA-Seq V2) (1100)'. The 'Enter Gene Set' section is empty. A 'Submit' button is at the bottom.

Supplementary Figure S6: Datamining with primary search with default setting and search for expression only (RNA-seq).

**Supplementary Table S1: lncRNAs used for primary search**

See Supplementary File 1

**Supplementary Table S1a: Primers used in this study**

For detection

---

|                  |                       |
|------------------|-----------------------|
| LINC00657-RT-5.1 | AAAGAGGTTGCCGACGTATG  |
| LINC00657-RT-3.1 | CAGGTCTCCAGCTCCATGT   |
| LINC00657-RT-5.2 | GCAGGAGAATCGCTTGA ACT |
| LINC00657-RT-3.2 | ATTCCCAAATGCAACCACTC  |

For dual gRNA

|               |                      |
|---------------|----------------------|
| LINC00657-T1A | TTCCGGTCCGGCAGAGATCG |
| LINC00657-T2A | ACTCTATTCTACAAGCAACG |

For donor vector

|                          |                                          |
|--------------------------|------------------------------------------|
| LINC00657-right-Sal1-5.1 | TCTTATCATGTCTGGTCGACTCCTTCATGCTTGGGCTCTG |
| LINC00657-right-Sal1-3.1 | TTGATATCACCGGTGTCGACGCTGTGTGTCAGGCATTACG |
| LINC00657-left-Spe-5.1   | CGACGGCCAGTGAAACTAGTCCCTGGCATAAGTCCCTATC |
| LINC00657-left-Spe-3.1   | CCTGTACAGGTACCACTAGTGACTTGGCAGTTCTCTGCGC |

---

**Supplementary Table S2: Alterations of lncRNAs and their frequency**

See Supplementary File 2

**Supplementary Table S3: Distribution of lncRNAs around 8q24**

See Supplementary File 3

**Supplementary Table S4: Cases with recurrence in red**

See Supplementary File 4

**Supplementary Table S5: lncRNAs associated with disease free survival**

See Supplementary File 5

**Supplementary Table S6: Alterations of lncRNAs associated with ER, PR and HER-2**

See Supplementary File 6
